# Supplementary material for: Preparation and Study of a Simple Three-Matrix Solid Electrolyte Membrane in Air
Source: MDPI journal article supplement (doi:10.3390/nano12173069), 2022-09-03
Supplement: s1 [file s1]

Supplementary Materials

# Preparation and Study of a Simple Three-Matrix Solid Electrolyte Membrane in Air

Xinghua Liang <sup>1,\*</sup>, Xingtao Jiang <sup>1</sup>, Linxiao Lan <sup>1,\*</sup>, Shuaibo Zeng <sup>2,\*</sup>, Meihong Huang <sup>3</sup> and Dongxue Huang <sup>1</sup>

<sup>1</sup> Guangxi Key Laboratory of Automobile Components and Vehicle Technology, Guangxi University of Science and Technology, Liuzhou 545006, China

<sup>2</sup> China School of Automotive and Transportation Engineering, Guangdong Polytechnic Normal University, Guangzhou 510632, China

<sup>3</sup> Guangdong Polytechnic of Industry and Commerce, Guangzhou 510550, China

\* Correspondence: lxh18589873093@163.com (X.L.); 15506749886@163.com (L.L.); zengshuaibo@gpnu.edu.cn (S.Z.); Tel.: +86-18589873093 (X.L.); +86-18107785376 (L.L.); +86-18819264279 (S.Z.).

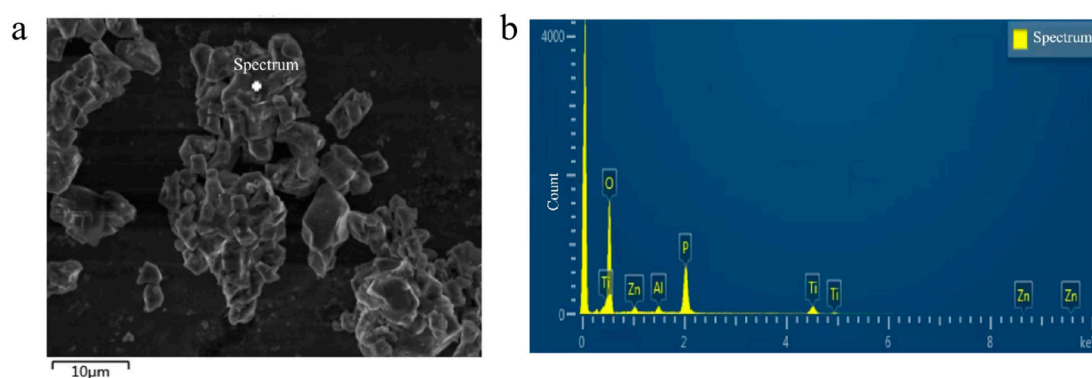

**Figure S1.** SEM-EDS of the LAZTP. (a) 10 μm size LAZTP. (b) Zn element content chart.

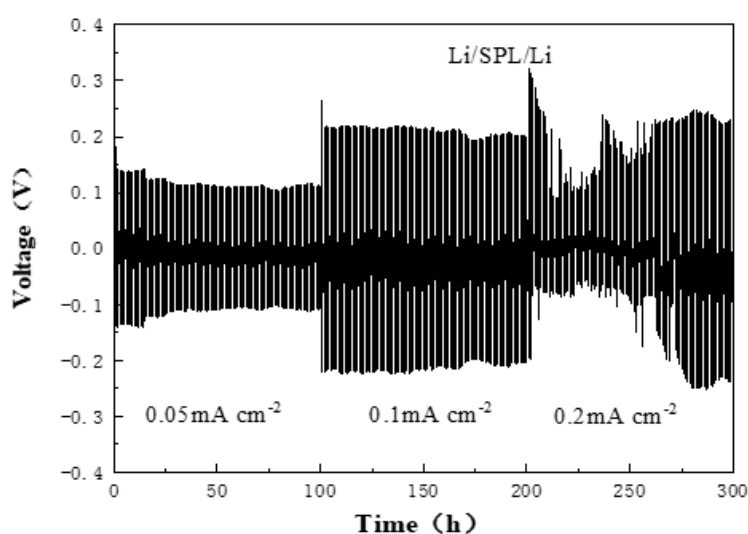

**Figure S2.** SPL's GCD at three different current densities.

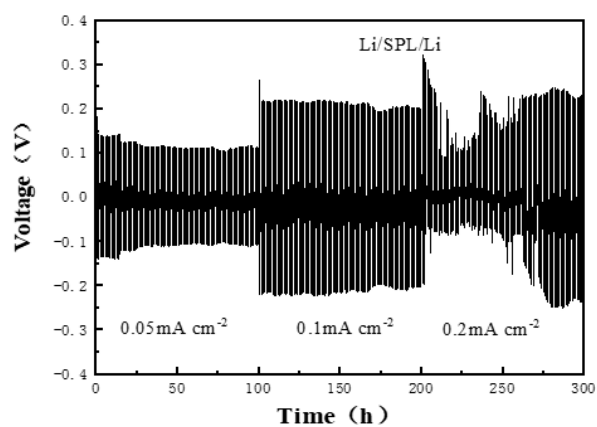

**Figure S3.** CV test of SPL/Li under different cycle rates.

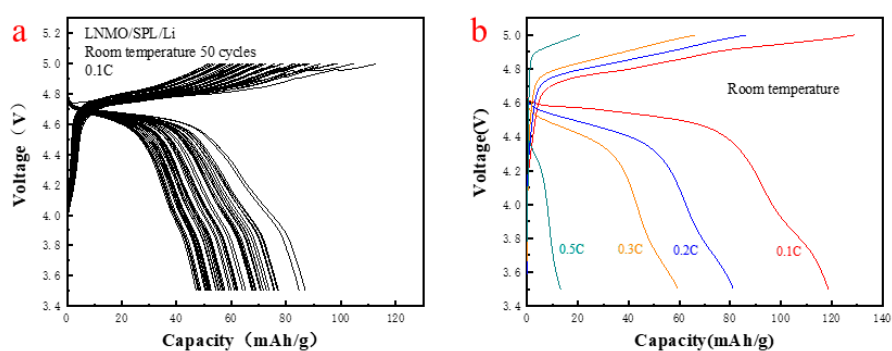

**Figure S4.** (a) 50 cycles of LNMO/SPL/Li at 0.1 C rate in the greenhouse. (b) The first charge and discharge of LNMO/SPL/Li at different rates.

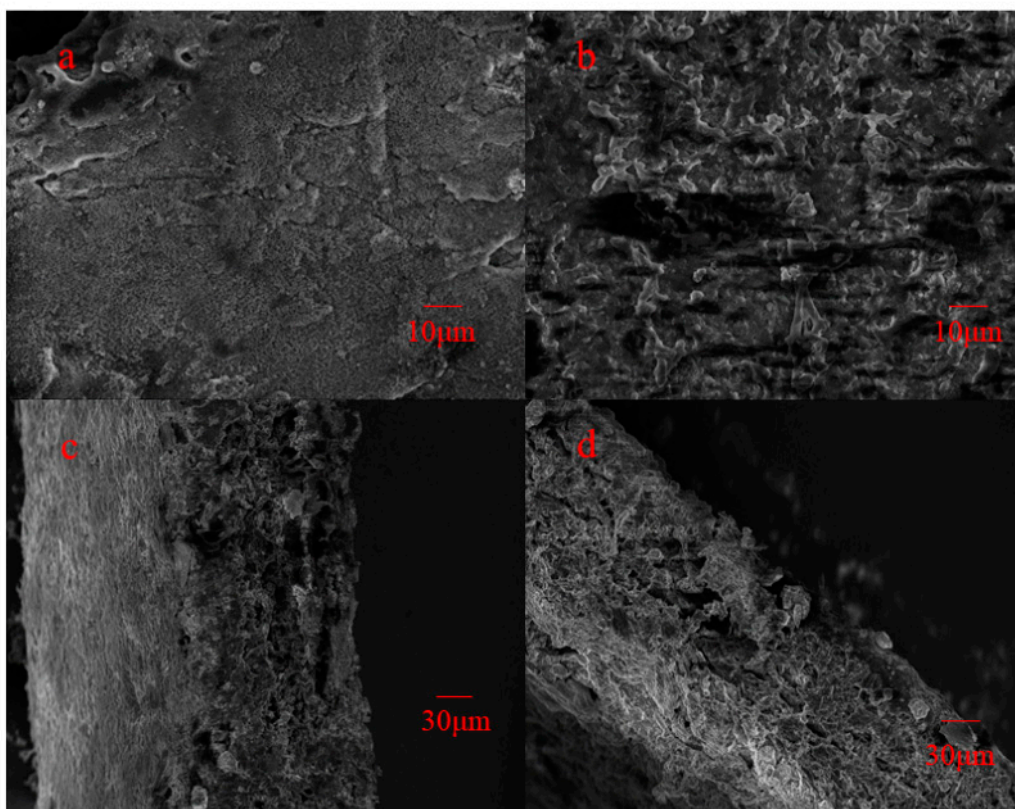

**Figure S5.** (a,b) Surface map of the SPLL before and after cycle. The SEM cross-sectional view of (c) and (d) SPLL cell.

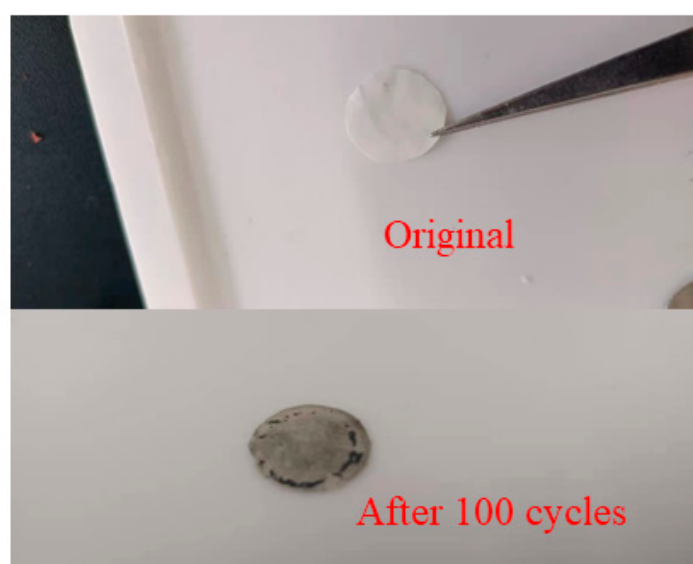

**Figure S6.** Physical image of the surface before and after the SPLL cycle.

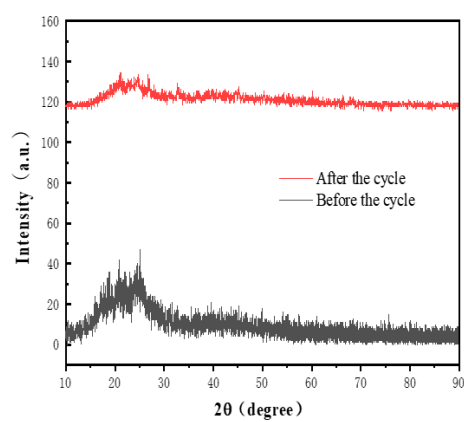

**Figure S7.** XRD before and after SPL cycle.

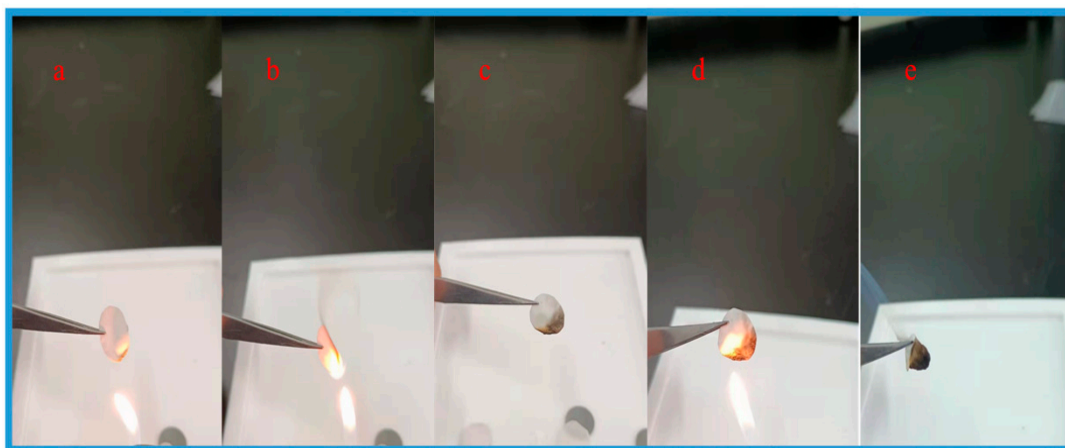

**Figure S8.** (a–e) Physical image of the surface before and after the SPL cycle.
